# Supplementary material for: Possibility of chiral recognition by adsorption on enantiomorphous crystals: the impact of crystal surface polarity
Source: Royal Society of Chemistry journal article supplement (doi:10.1039/d2cp01212j), 2022-01-01
Supplement: d2cp01212j1.pdf [file d2cp01212j1.pdf]

## Possibility of chiral recognition by adsorption on enantiomorphous crystals: the impact of crystal surface polarity.

Vladimir Yu. Gus'kov,<sup>\*a</sup> Gulshat A. Gallyamova,<sup>a</sup> Natalia I. Sairanova<sup>a</sup>, Yulia F. Sharafutdinova<sup>a</sup>, Leonard M. Khalilov<sup>b</sup>, Timur A. Mukhametzyanov<sup>c</sup>, Ilya M. Zinoviev<sup>a</sup> and Yulia Yu. Gainullina<sup>a</sup>

<sup>a</sup>Bashkir State University, 32 Zaki Validi str., Ufa, Russia.

<sup>b</sup>Institute of Petrochemistry and Catalysis RAS, 141 Oktyabrya av., Ufa, Russia

<sup>c</sup>A.M. Butlerov Chemical Institute, Kazan Federal University, Kremlevskaya Str. 18, Kazan 420008, Russia

\*corresponding author, Email: [guscov@mail.ru](mailto:guscov@mail.ru)

### Polarity calculations

The inverse gas chromatography was used to obtain polarity values. Two methods were applied: linear free energy relationship method (LFER) and Dong polarizability method.

#### *LFER method*

Hexane, heptane, octane, nonane, decane, undecane, benzene, toluene, ethanol, n-propanol, n-butanol, i-propanol, i-butanol and ethyl acetate (all chemically pure, Chimreaktivsnab, Russia) were used as probes. The probes were injected as sample vapours at the minimum possible amount, which allowed us to consider adsorption processes in the column that were closer to ideal linear chromatography, making it possible to equate specific retention volume  $V_g$  with the adsorption-desorption equilibrium constants. From

$$\Delta F = -RT \ln V_g \quad (1)$$

differential isosteric free energies ( $-\Delta F$ , kJ/mol) of adsorption were calculated.

Contributions of intermolecular interactions to adsorption free energy and surface polarity were evaluated using the method of the linear free energy relationship (LSER):

$$-\Delta F = \Delta F^{disp} + \Delta F^{spec} + \Delta F^{da} \quad (2)$$

$$-\Delta F = K_1 \alpha_B + K_2 \left( \frac{2\mu_B^2}{3kT} + \alpha_B \right) + K_3 W_b^a + K_4 W_b^d + K_5 \quad (3)$$

where  $\Delta F^{disp}$ ,  $\Delta F^{spec}$  and  $\Delta F^{da}$  are free energies of dispersion, orientation and induction, and donor-acceptor interactions;  $K_1$ – $K_5$  are coefficients characterizing the sorbent surface properties: dispersion, induction and orientation, electron-donor and electron-acceptor, respectively;  $\alpha_B$ ,  $\mu_B$ ,  $W_b^a$  and  $W_b^d$  are, respectively, polarizability, dipole moment, and electron-acceptor and electron-donor constants of the adsorbate.  $k$  is the Boltzmann constant, and  $T$  is temperature, K. Eq. (3) coefficients were calculated by multiple regression analysis in REGRES 23 software (ENEK Group, Russia).

From coefficients  $K_1$ – $K_5$ ,  $\Delta F^{disp}$ ,  $\Delta F^{spec}$  and  $\Delta F^{da}$  were calculated. We used the average impact of  $\Delta F^{spec}$  and  $\Delta F^{da}$  in  $\Delta F$  as parameter ( $P$ ) to compare initial and modified sorbent polarities:

$$P = \frac{\sum \left( \frac{\Delta F_n^{spec} + \Delta F_n^{da}}{\Delta F_n} \right)}{n_{probes}} \cdot 100\% - P_{GCB} \quad (6)$$

where  $n_{probes}$  is the number of adsorbates. As a reference, the  $P_{GCB}$  graphitized carbon black was used.

### *Dong method*

The second method is in using linear dependence of free energy of sorption of alkanes from the polarizability (Dong method). At this method, it is suggested, that the alkanes interacts with surface only by dispersion interactions. The energy of nonspecific interactions of other molecules considered as a sorption energy of hypothetic alkane with the same polarizability. The energy of specific interactions can be calculated as a difference between the total sorption energy and the energy of nonspecific interactions.

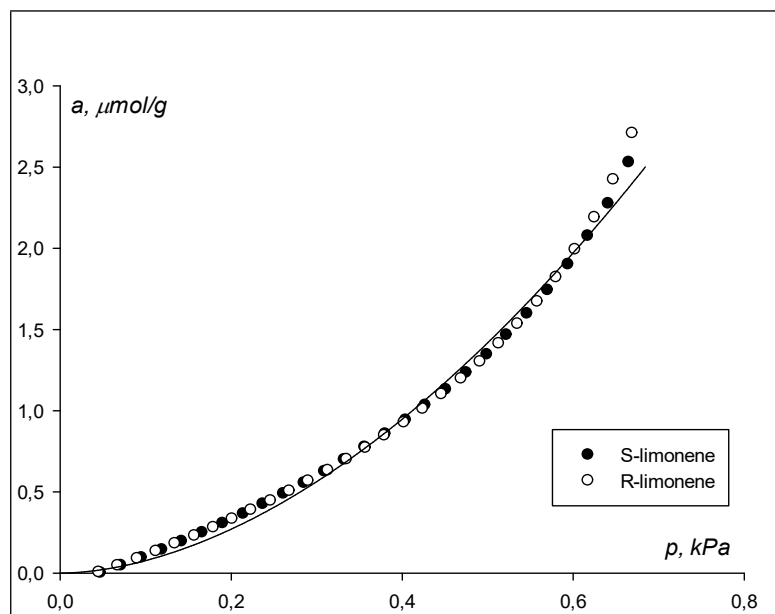

Figure 1S. Isotherms of limonene vapors adsorption at 50 °C by hippuric acid

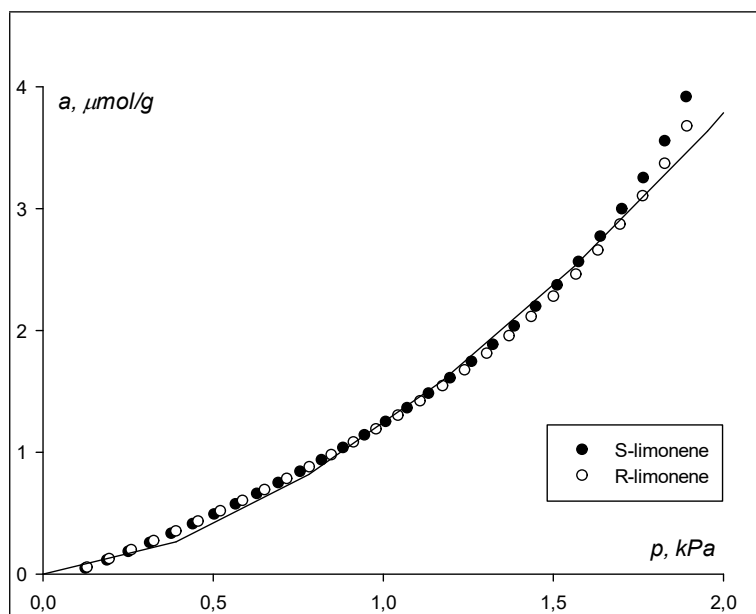

Figure 2S. Isotherms of limonene vapors adsorption at 70 °C by hippuric acid

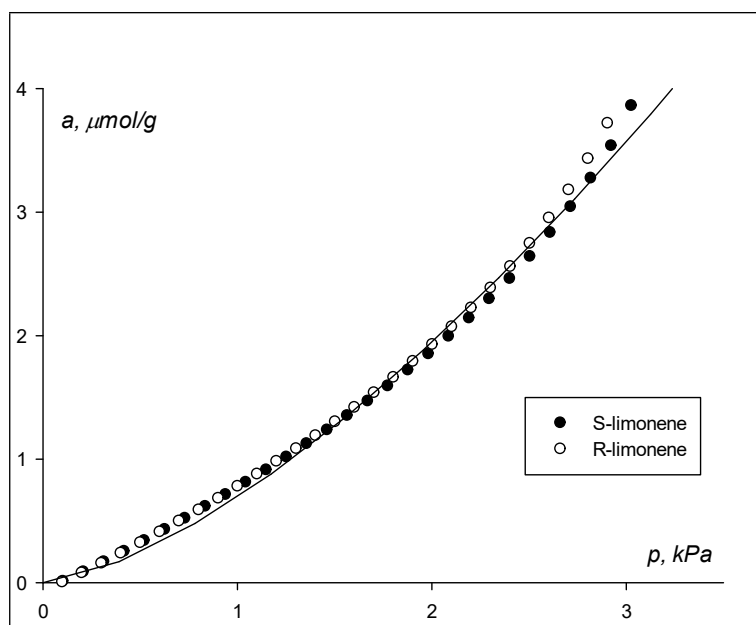

Figure 3S. Isotherms of limonene vapors adsorption at 80 °C by hippuric acid

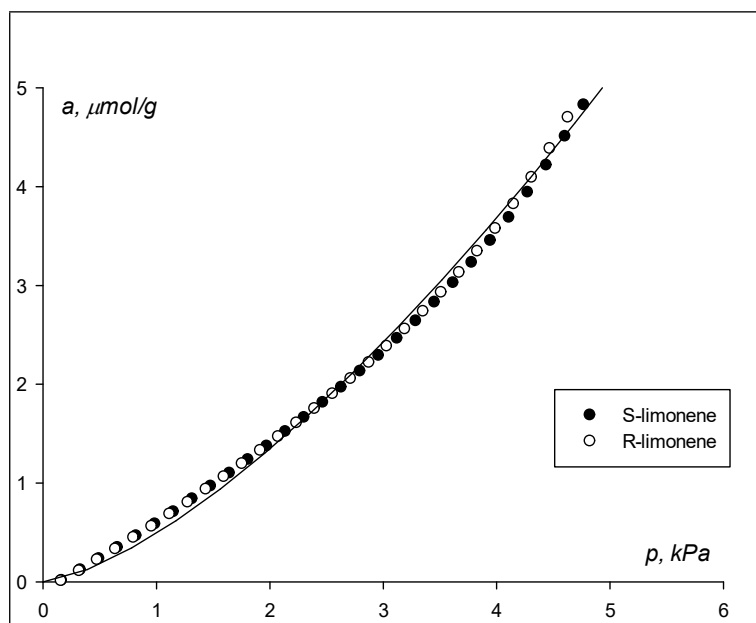

Figure 4S. Isotherms of limonene vapors adsorption at 90 °C by hippuric acid

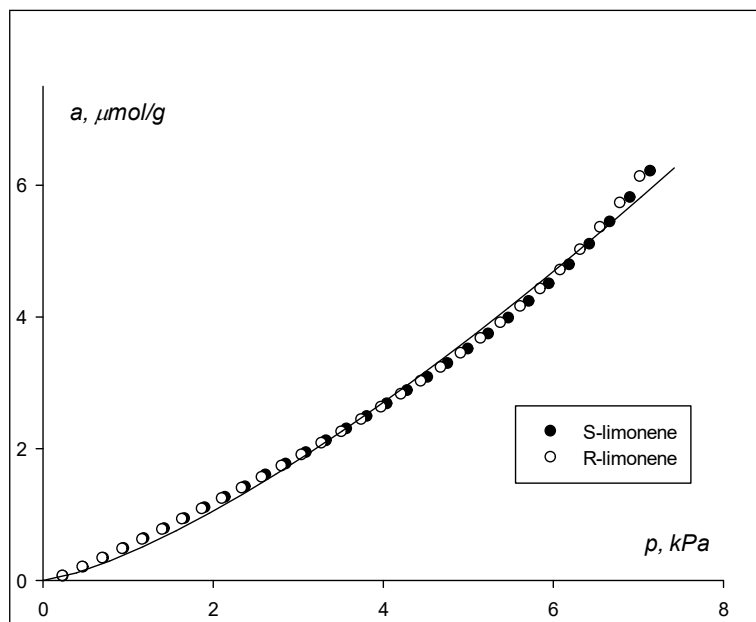

Figure 5S. Isotherms of limonene vapors adsorption at 100 °C by hippuric acid

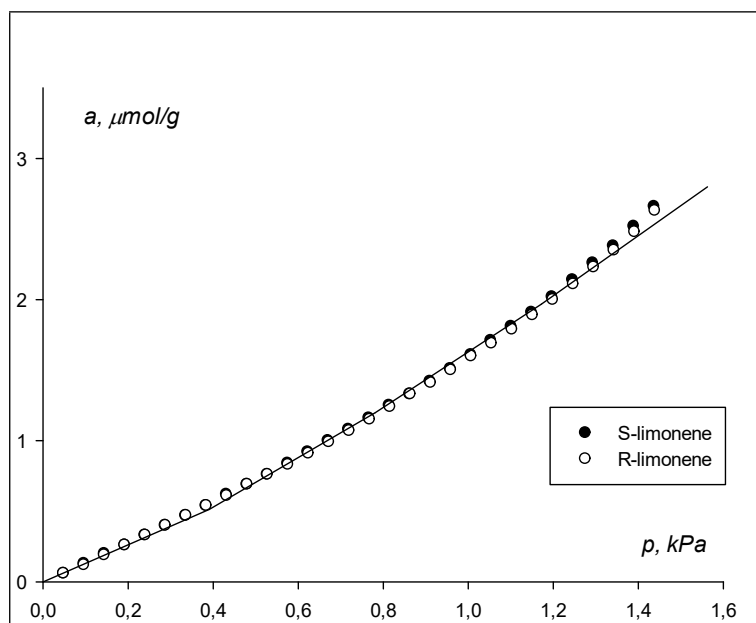

Figure 6S. Isotherms of limonene vapors adsorption at 80 °C by phloroglucinol

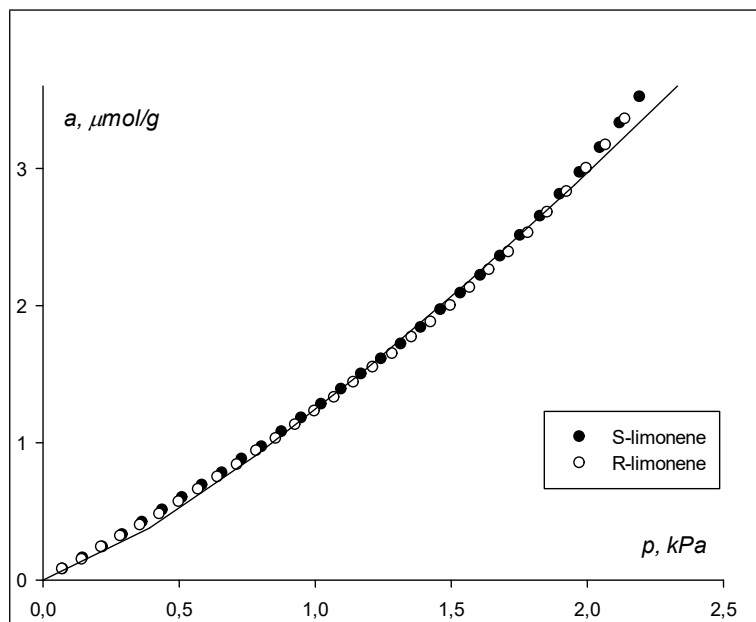

Figure 7S. Isotherms of limonene vapors adsorption at 90 °C by phloroglucinol

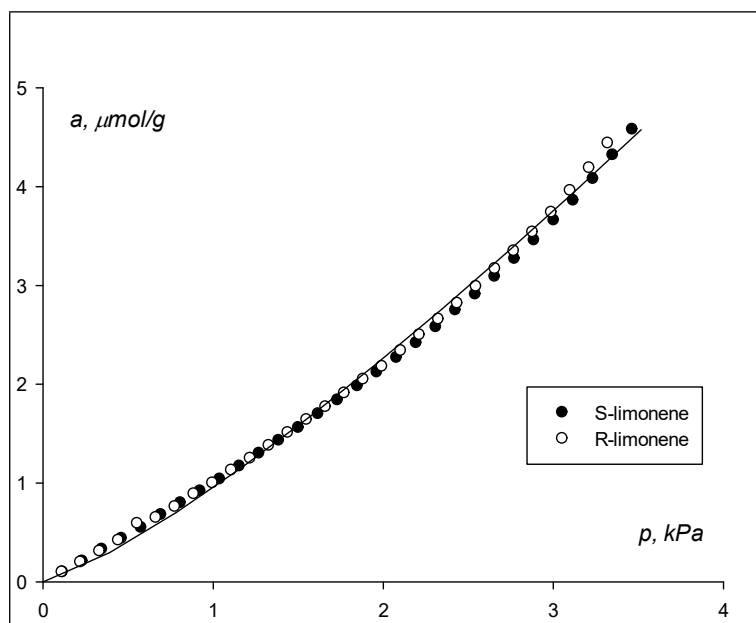

Figure 8S. Isotherms of limonene vapors adsorption at 100 °C by phloroglucinol

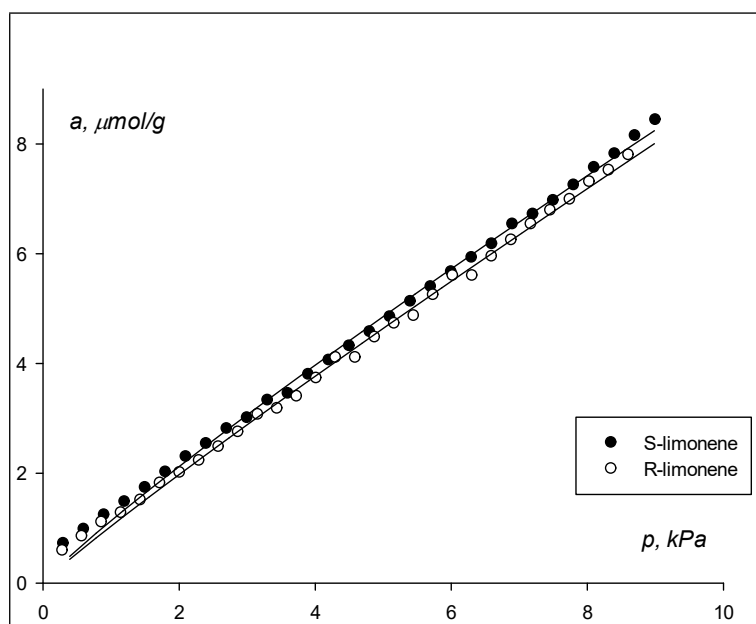

Figure 9S. Isotherms of limonene vapors adsorption at 120 °C by phloroglucinol

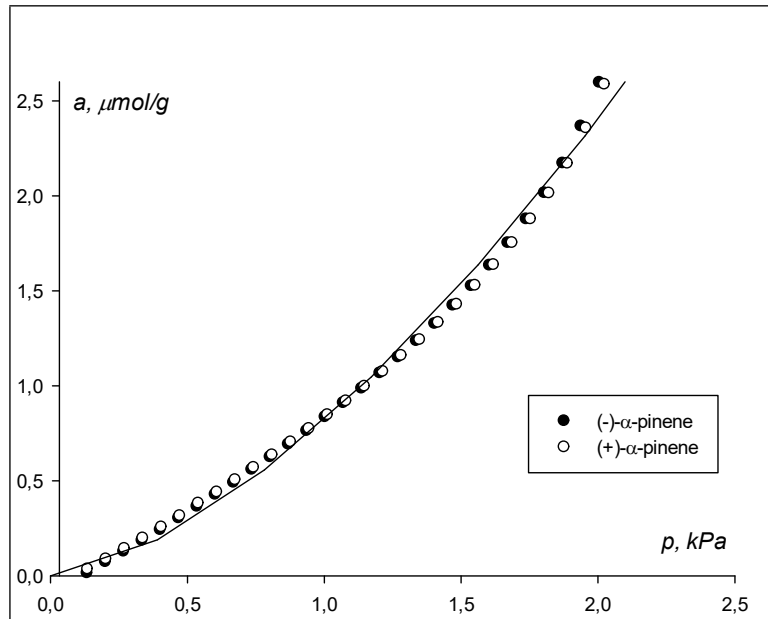

Figure 10S. Isotherms of  $\alpha$ -pinenes vapors adsorption at 50 °C by hippuric acid

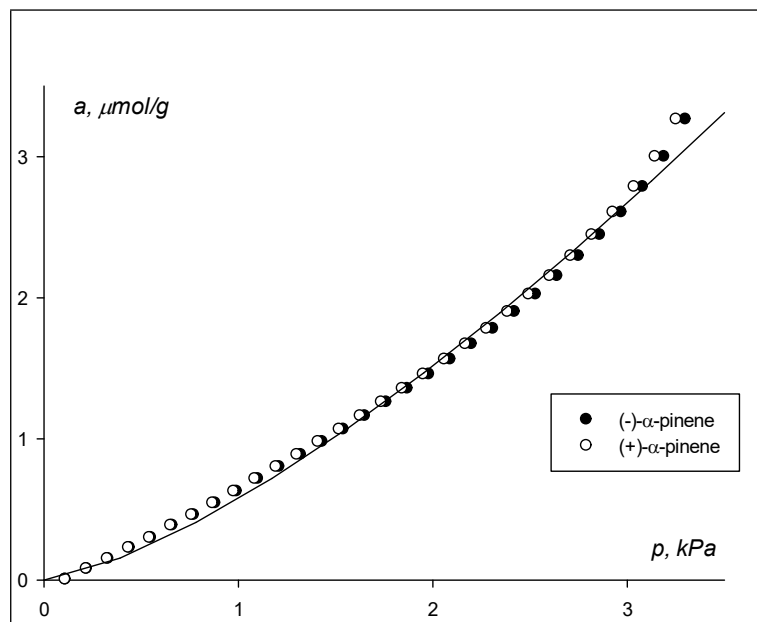

Figure 11S. Isotherms of  $\alpha$ -pinenes vapors adsorption at 60 °C by hippuric acid



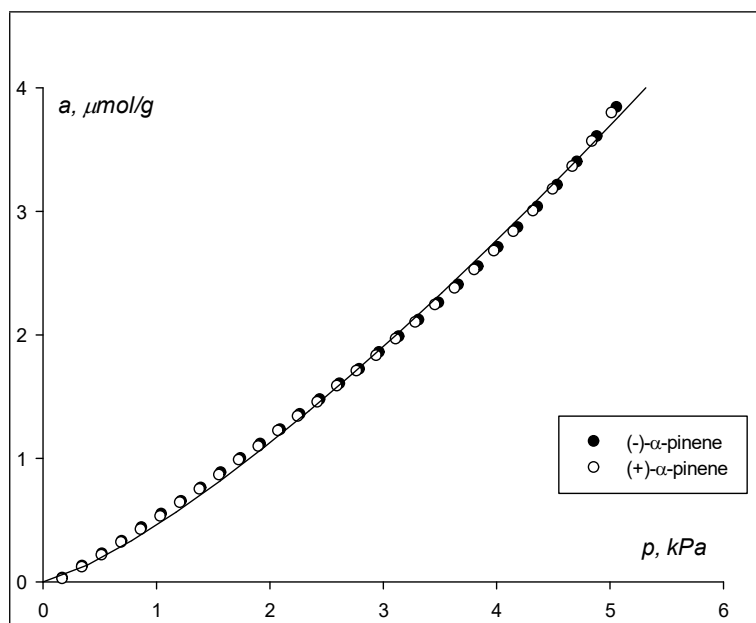

Figure 12S. Isotherms of  $\alpha$ -pinenes vapors adsorption at 70 °C by hippuric acid

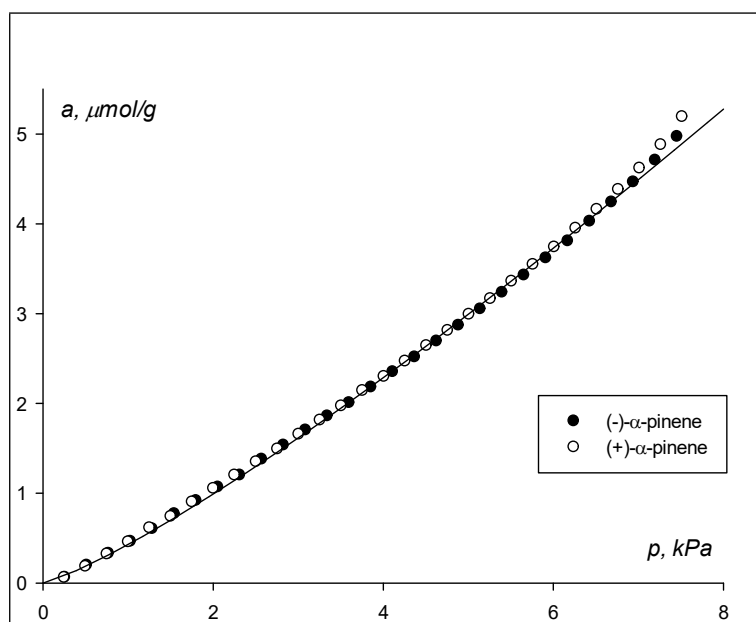

Figure 13S. Isotherms of  $\alpha$ -pinenes vapors adsorption at 80 °C by hippuric acid

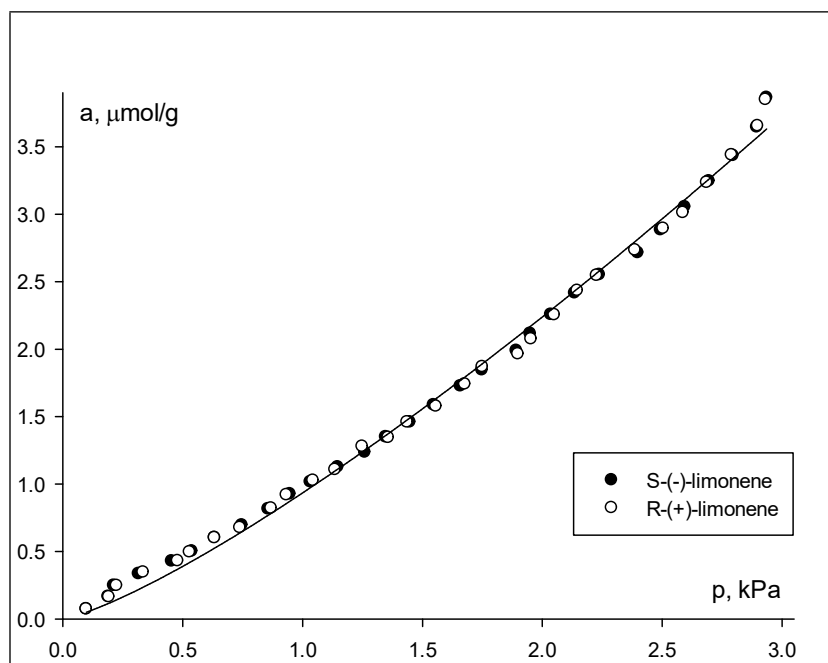

Figure 14S. Isotherms of limonenes vapors adsorption at 60 °C by hippuric acid N-crystals

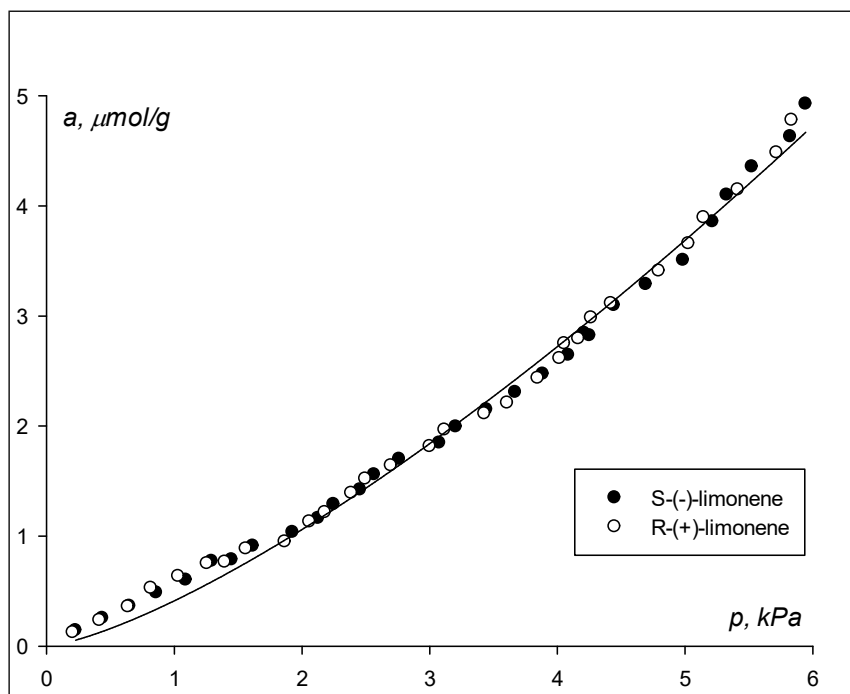

Figure 15S. Isotherms of limonenes vapors adsorption at 70 °C by phloroglucinol N-crystals

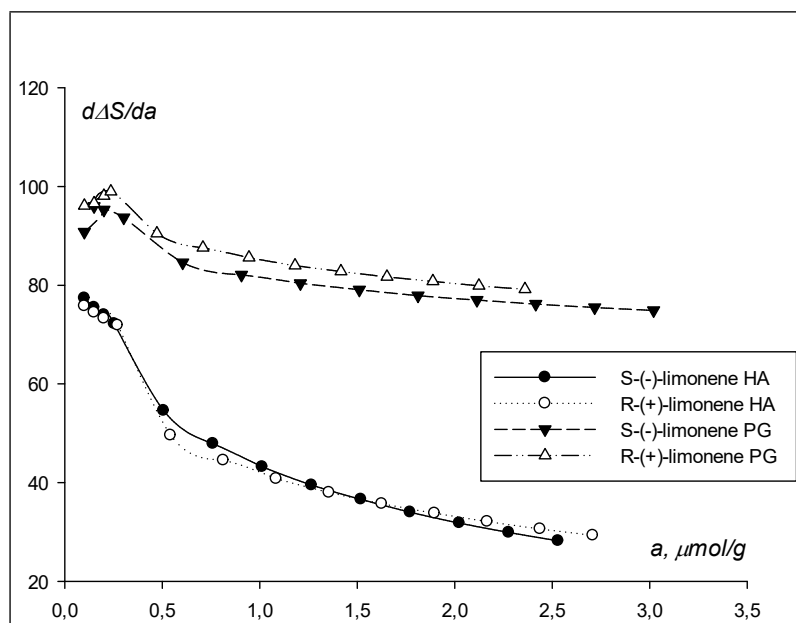

Figure 16S. Differential entropies of limonenes adsorption on hippuric acid (HA) and phloroglucinol (PG) crystals at 90 °C

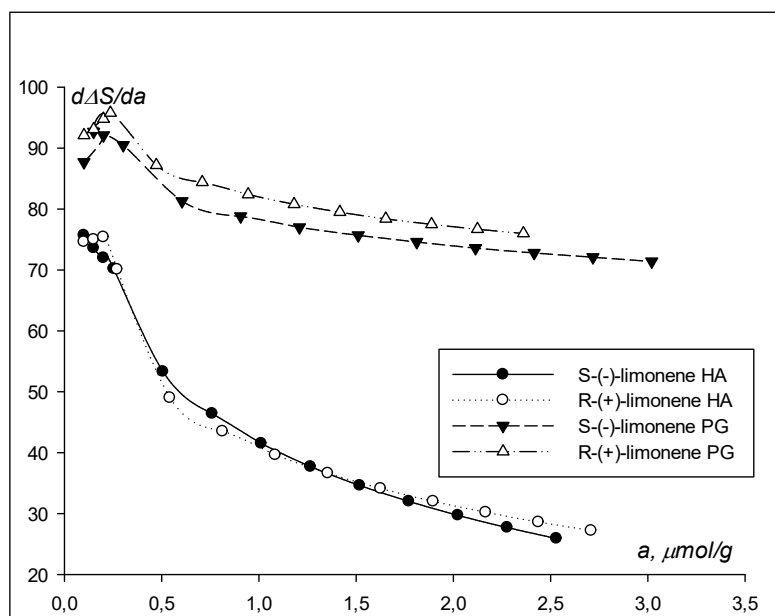

Figure 17S. Differential entropies of limonenes adsorption on hippuric acid (HA) and phloroglucinol (PG) crystals at 100 °C

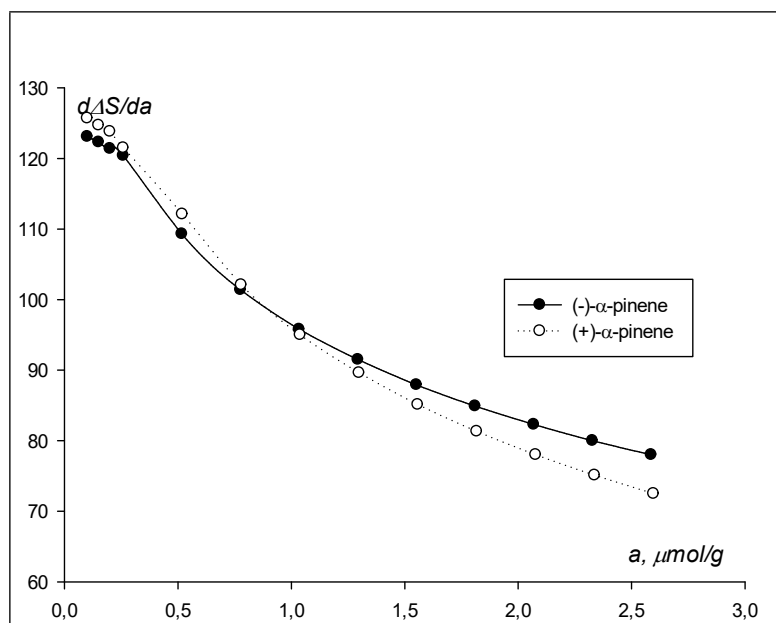

Figure 18S. Differential entropies of  $\alpha$ -pinenes adsorption on hippuric acid crystals at 50 °C

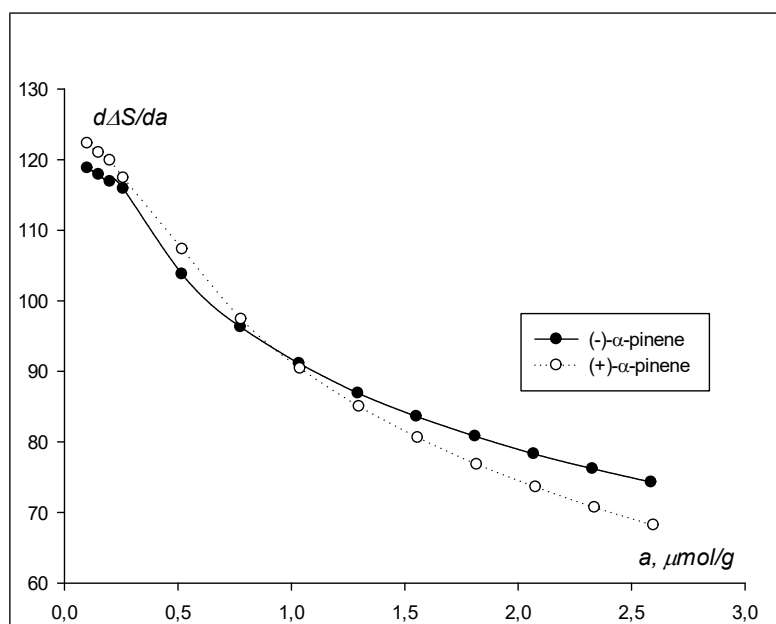

Figure 19S. Differential entropies of  $\alpha$ -pinenes adsorption on hippuric acid crystals at 60 °C

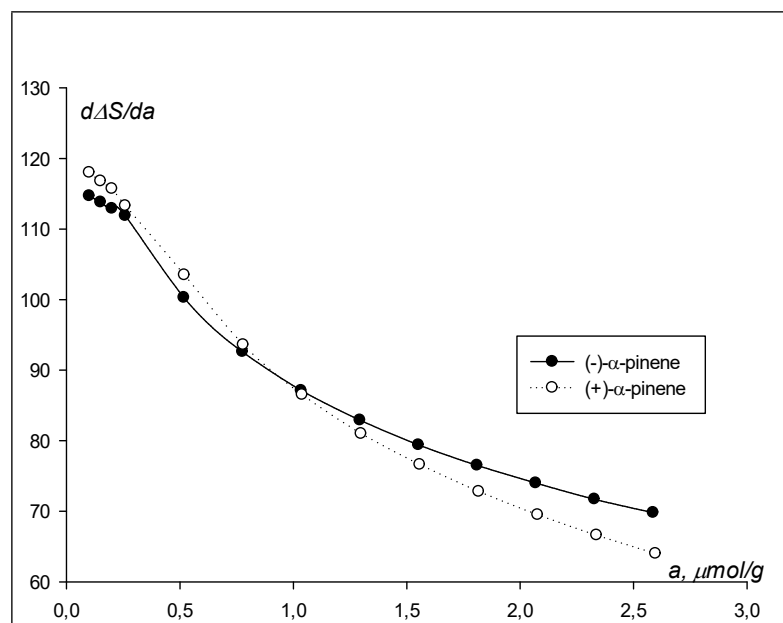

Figure 20S. Differential entropies of  $\alpha$ -pinenes adsorption on hippuric acid crystals at 70 °C

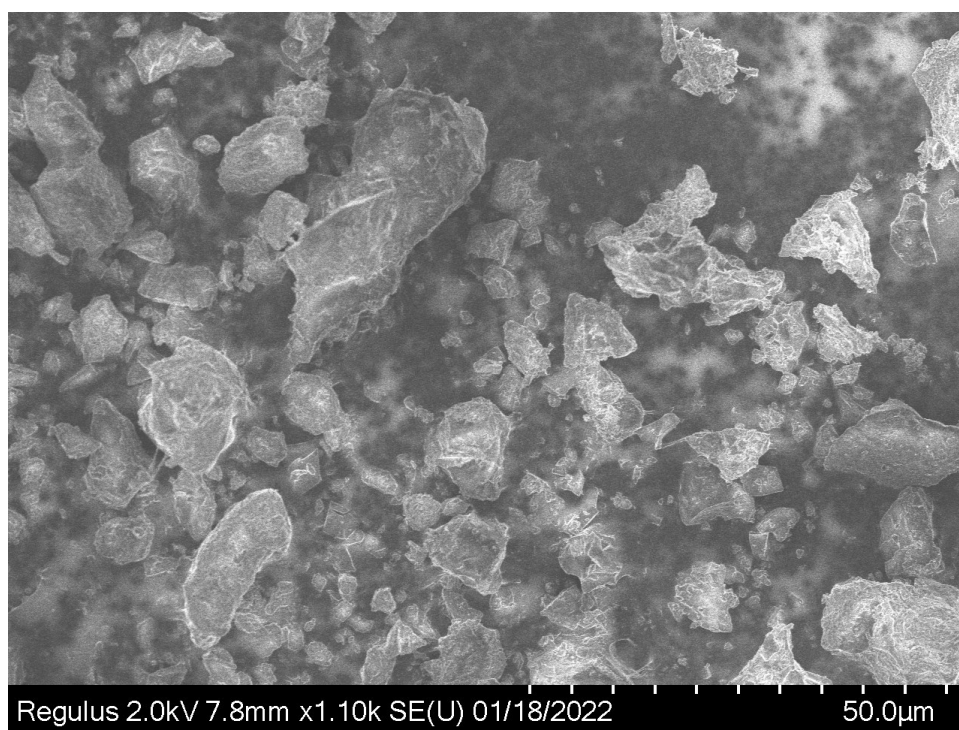

Figure 21S. SEM images of phloroglucinol crystals, obtained from acetonitrile

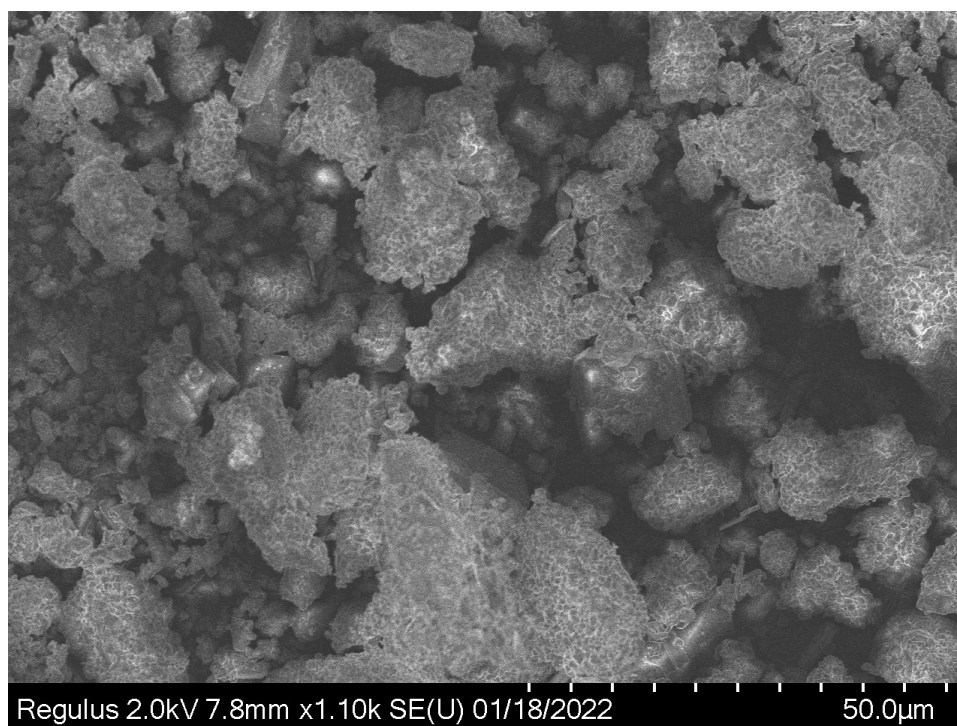

Figure 22S. SEM images of phloroglucinol crystals, obtained from water

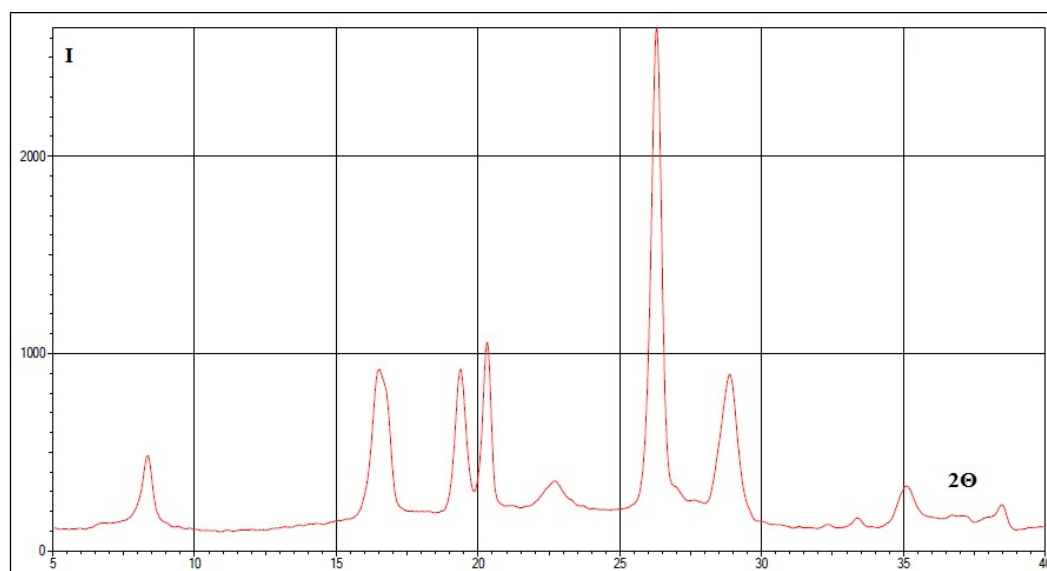

Figure 23S. Powder XRD of phloroglucinol crystals, obtained from acetonitrile

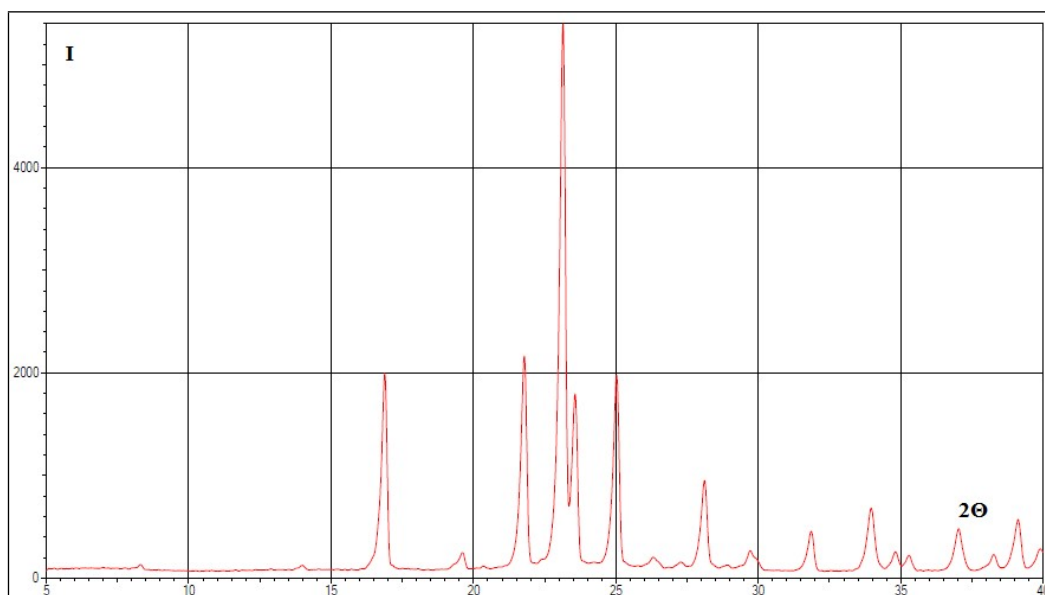

Figure 24S. Powder XRD of phloroglucinol crystals, obtained from water

Table 1S. P-values for pairs of points of of limonene vapours adsorption at 100 °C on phloroglucinol crystals ( $\alpha = 0.05$ ).

| P, kPa | p     |
|--------|-------|--------|-------|--------|-------|--------|-------|--------|-------|
| 0.06   | 0,055 | 0.46   | 0.026 | 0.86   | 0,054 | 1.26   | 0,066 | 1.66   | 0.060 |
| 0.13   | 0,230 | 0.53   | 0.206 | 0.93   | 0,066 | 1.33   | 0,068 | 1.72   | 0.051 |
| 0.19   | 0,013 | 0.59   | 0.061 | 0.99   | 0,089 | 1.39   | 0,071 | 1.79   | 0.053 |
| 0.26   | 0,092 | 0.66   | 0.069 | 1.06   | 0,096 | 1.46   | 0,072 | 1.86   | 0.049 |
| 0.33   | 0,596 | 0.73   | 0.075 | 1.13   | 0,072 | 1.52   | 0,063 | 1.92   | 0.047 |
| 0.39   | 0,017 | 0.79   | 0.050 | 1.19   | 0,062 | 1.59   | 0,057 | 1.99   | 0.031 |

Table 2S. P-values for pairs of points of of limonene vapours adsorption at 120 °C on phloroglucinol crystals ( $\alpha = 0.05$ ).

| P, kPa | p     |
|--------|-------|--------|-------|--------|-------|--------|-------|--------|-------|
| 0.16   | 0.268 | 1.14   | 0.103 | 2.12   | 0.073 | 3.10   | 0.063 | 4.08   | 0.199 |
| 0.32   | 0.251 | 1.30   | 0.094 | 2.29   | 0.124 | 3.27   | 0.117 | 4.25   | 0.174 |
| 0.49   | 0.331 | 1.47   | 0.085 | 2.45   | 0.424 | 3.43   | 0.280 | 4.41   | 0.086 |
| 0.65   | 0.164 | 1.63   | 0.133 | 2.61   | 0.066 | 3.59   | 0.060 | 4.58   | 0.129 |
| 0.81   | 0.139 | 1.79   | 0.142 | 2.78   | 0.117 | 3.76   | 0.063 | 4.74   | 0.083 |
| 0.98   | 0.154 | 1.96   | 0.357 | 2.94   | 0.238 | 3.92   | 0.108 | 4.90   | 0.086 |

Table 3S. P-values for pairs of points of of limonene vapours adsorption at 160 °C on phloroglucinol crystals ( $\alpha = 0.05$ ).

| P, kPa | p     |
|--------|-------|--------|-------|--------|-------|--------|-------|--------|-------|
| 0.23   | 0.871 | 1.64   | 0.013 | 3.04   | 0.149 | 4.45   | 0.019 | 5.86   | 0.021 |
| 0.46   | 0.116 | 1.87   | 0.042 | 3.28   | 0.053 | 4.69   | 0.105 | 6.09   | 0.073 |
| 0.70   | 0.210 | 2.11   | 0.017 | 3.51   | 0.118 | 4.92   | 0.109 | 6.33   | 0.059 |
| 0.93   | 0.150 | 2.34   | 0.061 | 3.75   | 0.004 | 5.16   | 0.010 | 6.56   | 0.058 |
| 1.17   | 0.044 | 2.58   | 0.021 | 3.98   | 0.069 | 5.39   | 0.135 | 6.80   | 0.068 |
| 1.40   | 0.132 | 2.81   | 0.102 | 4.22   | 0.009 | 5.63   | 0.056 | 7.03   | 0.069 |

Table 4S. P-values for pairs of points of of limonene vapours adsorption at 170 °C on phloroglucinol crystals ( $\alpha = 0.05$ ).

| P, kPa | p     |
|--------|-------|--------|-------|--------|-------|--------|-------|--------|-------|
| 0.33   | 0.055 | 2.36   | 0.223 | 4.38   | 0.129 | 6.41   | 0.400 | 8.43   | 0.904 |
| 0.67   | 0.052 | 2.70   | 0.116 | 4.72   | 0.340 | 6.75   | 0.894 | 8.77   | 0.738 |
| 1.01   | 0.433 | 3.03   | 0.163 | 5.06   | 0.457 | 7.08   | 0.957 | 9.11   | 0.794 |
| 1.35   | 0.071 | 3.37   | 0.216 | 5.40   | 0.631 | 7.76   | 0.803 | 9.45   | 0.929 |
| 1.68   | 0.090 | 3.71   | 0.261 | 5.73   | 0.800 | 8.10   | 0.135 | 9.78   | 0.982 |
| 2.02   | 0.091 | 4.05   | 0.219 | 6.07   | 0.440 | 8,27   | 0.056 | 10.12  | 0.962 |

Table 5S. P-values for pairs of points of of limonene vapours adsorption at 175 °C on phloroglucinol crystals ( $\alpha = 0.05$ ).

| P, kPa | p     |
|--------|-------|--------|-------|--------|-------|--------|-------|--------|-------|
| 0.45   | 0.940 | 3.17   | 0.050 | 5.90   | 0.154 | 8.62   | 0.049 | 11.35  | 0.115 |
| 0.90   | 0.108 | 3.63   | 0.122 | 6.35   | 0.037 | 9.08   | 0.129 | 11.80  | 0.109 |
| 1.36   | 0.063 | 4.08   | 0.167 | 6.81   | 0.051 | 9.53   | 0.116 | 12.26  | 0.066 |
| 1.81   | 0.160 | 4.54   | 0.036 | 7.26   | 0.070 | 9.99   | 0.107 | 12.71  | 0.069 |
| 2.27   | 0.085 | 4.99   | 0.144 | 7.72   | 0.055 | 10.44  | 0.061 | 13.17  | 0.075 |
| 2.72   | 0.083 | 5.45   | 0.107 | 8.17   | 0.044 | 10.90  | 0.105 | 13.62  | 0.079 |

Table 6S. P-values for pairs of points of of limonene vapours adsorption at 180 °C on phloroglucinol crystals ( $\alpha = 0.05$ ).

| P, kPa | p     |
|--------|-------|--------|-------|--------|-------|--------|-------|--------|-------|
| 0.42   | 0.108 | 2.99   | 0.455 | 5.56   | 0.97  | 8.13   | 0.334 | 10.69  | 0.411 |
| 0.85   | 0.175 | 3.42   | 0.179 | 5.99   | 0.461 | 8.55   | 0.444 | 11.12  | 0.152 |
| 1.28   | 0.161 | 3.85   | 0.003 | 6.41   | 0.549 | 8.98   | 0.232 | 11.55  | 0.391 |
| 1.71   | 0.315 | 4.27   | 0.133 | 6.84   | 0.853 | 9.41   | 0.593 | 11.98  | 0.710 |
| 2.13   | 0.337 | 4.70   | 0.050 | 7.27   | 0.560 | 9.84   | 0.504 | 12.41  | 0.463 |
| 2.56   | 0.112 | 5.13   | 0.509 | 7.70   | 0.563 | 10.27  | 0.429 | 12.83  | 0.506 |

Table 7S. P-values for pairs of points of of limonene vapours adsorption at 50 °C on hippuric acid crystals ( $\alpha = 0.05$ ).

| P, kPa | p     |
|--------|-------|--------|-------|--------|-------|--------|-------|--------|-------|
| 0.14   | 0.048 | 1.01   | 0.242 | 1.87   | 0.512 | 2.73   | 0.779 | 3.59   | 0.898 |
| 0.29   | 0.169 | 1.15   | 0.128 | 2.01   | 0.669 | 2.87   | 0.350 | 3.74   | 0.882 |
| 0.43   | 0.113 | 1.29   | 0.392 | 2.16   | 0.544 | 3.02   | 0.799 | 3.88   | 0.918 |
| 0.57   | 0.320 | 1.44   | 0.404 | 2.30   | 0.618 | 3.16   | 0.908 | 4.02   | 0.857 |
| 0.72   | 0.187 | 1.58   | 0.534 | 2.44   | 0.553 | 3.30   | 0.818 | 4.17   | 0.943 |
| 0.86   | 0.119 | 1.72   | 0.453 | 2.59   | 0.760 | 3.45   | 0.888 | 4.31   | 0.916 |



Table 8S. P-values for pairs of points of of limonene vapours adsorption at 60 °C on hippuric acid crystals ( $\alpha = 0.05$ ).

| P, kPa | p     |
|--------|-------|--------|-------|--------|-------|--------|-------|--------|-------|
| 0.24   | 0.595 | 1.65   | 0.438 | 3.07   | 0.699 | 4.49   | 0.617 | 5.90   | 0.594 |
| 0.47   | 0.318 | 1.89   | 0.562 | 3.31   | 0.442 | 4.72   | 0.622 | 6.14   | 0.624 |
| 0.71   | 0.608 | 2.13   | 0.644 | 3.54   | 0.442 | 4.96   | 0.797 | 6.38   | 0.639 |
| 0.94   | 0.239 | 2.36   | 0.747 | 3.78   | 0.817 | 5.19   | 0.707 | 6.61   | 0.601 |
| 1.18   | 0.483 | 2.60   | 0.758 | 4.01   | 0.856 | 5.43   | 0.652 | 6.85   | 0.595 |
| 1.42   | 0.619 | 2.83   | 0.875 | 4.25   | 0.872 | 5.67   | 0.625 | 7.08   | 0.646 |

Table 9S. P-values for pairs of points of of limonene vapours adsorption at 70 °C on hippuric acid crystals ( $\alpha = 0.05$ ).

| P, kPa | p     | P, kPa | p     | P, kPa | p                    | P, kPa | p                    | P, kPa | p                    |
|--------|-------|--------|-------|--------|----------------------|--------|----------------------|--------|----------------------|
| 0.38   | 0.815 | 2.65   | 0.012 | 4.91   | $1.34 \cdot 10^{-3}$ | 7.18   | $1.55 \cdot 10^{-3}$ | 9.45   | $4.50 \cdot 10^{-4}$ |
| 0.76   | 0.303 | 3.02   | 0.006 | 5.29   | $1.33 \cdot 10^{-3}$ | 7.56   | $6.68 \cdot 10^{-4}$ | 9.83   | $6.76 \cdot 10^{-4}$ |
| 1.13   | 0.039 | 3.40   | 0.003 | 5.67   | $1.24 \cdot 10^{-3}$ | 7.94   | $2.80 \cdot 10^{-4}$ | 10.20  | $6.14 \cdot 10^{-4}$ |
| 1.51   | 0.355 | 3.78   | 0.002 | 6.05   | $4.67 \cdot 10^{-4}$ | 8.31   | $7.82 \cdot 10^{-4}$ | 10.58  | $7.38 \cdot 10^{-4}$ |
| 1.89   | 0.007 | 4.16   | 0.004 | 6.42   | $7.51 \cdot 10^{-4}$ | 8.69   | $3.15 \cdot 10^{-4}$ | 10.96  | $7.17 \cdot 10^{-4}$ |
| 2.27   | 0.003 | 4.54   | 0.003 | 6.80   | $8.19 \cdot 10^{-4}$ | 9.07   | $7.29 \cdot 10^{-4}$ | 11.34  | $7.48 \cdot 10^{-4}$ |

Table 10S. P-values for pairs of points of of limonene vapours adsorption at 80 °C on hippuric acid crystals ( $\alpha = 0.05$ ).

| P, kPa | p     |
|--------|-------|--------|-------|--------|-------|--------|-------|--------|-------|
| 0.62   | 0.032 | 4.33   | 0.383 | 8.04   | 0.903 | 11.75  | 0.889 | 15.46  | 0.753 |
| 1.23   | 0.052 | 4.94   | 0.598 | 8.65   | 0.854 | 12.37  | 0.833 | 16.08  | 0.765 |
| 1.85   | 0.186 | 5.56   | 0.192 | 9.27   | 0.614 | 12.98  | 0.869 | 16.69  | 0.719 |
| 2.47   | 0.146 | 6.18   | 0.281 | 9.89   | 0.751 | 13.60  | 0.863 | 17.31  | 0.714 |
| 3.09   | 0.763 | 6.80   | 0.569 | 10.51  | 0.803 | 14.22  | 0.756 | 17.93  | 0.705 |
| 3.71   | 0.705 | 7.42   | 0.985 | 11.13  | 0.878 | 14.84  | 0.770 | 18.55  | 0.715 |

Table 11S. P-values for pairs of points of of limonene vapours adsorption at 90 °C on hippuric acid crystals ( $\alpha = 0.05$ ).

| P, kPa | p     |
|--------|-------|--------|-------|--------|-------|--------|-------|--------|-------|
| 0.86   | 0.058 | 6.05   | 0.348 | 11.23  | 0.899 | 16.42  | 0.215 | 21.60  | 0.145 |
| 1.73   | 0.188 | 6.91   | 0.682 | 12.10  | 0.773 | 17.28  | 0.600 | 22.47  | 0.084 |
| 2.59   | 0.231 | 7.78   | 0.628 | 12.96  | 0.780 | 18.15  | 0.490 | 23.33  | 0.121 |
| 3.46   | 0.563 | 8.64   | 0.959 | 13.83  | 0.857 | 19.01  | 0.249 | 24.19  | 0.102 |
| 4.32   | 0.242 | 9.50   | 0.629 | 14.69  | 0.851 | 19.87  | 0.074 | 25.06  | 0.119 |
| 5.18   | 0.970 | 10.37  | 0.763 | 15.55  | 0.378 | 20.74  | 0.195 | 25.92  | 0.103 |

Table 12S. P-values for pairs of points of of limonene vapours adsorption at 100 °C on hippuric acid crystals ( $\alpha = 0.05$ ).

| P, kPa | p     |
|--------|-------|--------|-------|--------|-------|--------|-------|--------|-------|
| 1.26   | 0.214 | 8.81   | 0.940 | 16.36  | 0.229 | 23.92  | 0.022 | 31.47  | 0.094 |
| 2.52   | 0.382 | 10.07  | 0.939 | 17.62  | 0.417 | 25.17  | 0.285 | 32.73  | 0.160 |
| 3.78   | 0.310 | 11.33  | 0.456 | 18.88  | 0.086 | 26.43  | 0.343 | 33.98  | 0.103 |
| 5.03   | 0.213 | 12.59  | 0.361 | 20.14  | 0.945 | 27.69  | 0.322 | 35.24  | 0.125 |
| 6.29   | 0.634 | 13.85  | 0.516 | 21.40  | 0.956 | 28.95  | 0.207 | 36.50  | 0.112 |
| 7.55   | 0.910 | 15.10  | 0.717 | 22.66  | 0.496 | 30.21  | 0.204 | 37.76  | 0.156 |

Table 13S. P-values for pairs of points of of  $\alpha$ -pinenes vapours adsorption at 50 °C on hippuric acid crystals ( $\alpha = 0.05$ ).

| P, kPa | p     |
|--------|-------|--------|-------|--------|-------|--------|-------|--------|-------|
| 0.35   | 0.190 | 2.46   | 0.407 | 4.56   | 0.795 | 6.67   | 0.571 | 8.78   | 0.543 |
| 0.70   | 0.265 | 2.81   | 0.488 | 4.91   | 0.367 | 7.02   | 0.472 | 9.13   | 0.246 |
| 1.05   | 0.070 | 3.16   | 0.502 | 5.27   | 0.628 | 7.37   | 0.634 | 9.48   | 0.482 |
| 1.40   | 0.360 | 3.51   | 0.127 | 5.62   | 0.070 | 7.72   | 0.423 | 9.83   | 0.345 |
| 1.76   | 0.151 | 3.86   | 0.346 | 5.97   | 0.060 | 8.07   | 0.673 | 10.18  | 0.242 |
| 2.11   | 0.464 | 4.21   | 0.437 | 6.32   | 0.736 | 8.43   | 0.675 | 10.53  | 0.146 |

Table 14S. P-values for pairs of points of of  $\alpha$ -pinenes vapours adsorption at 60 °C on hippuric acid crystals ( $\alpha = 0.05$ ).

| P, kPa | p     |
|--------|-------|--------|-------|--------|-------|--------|-------|--------|-------|
| 0.56   | 0.050 | 3.91   | 0.867 | 7.26   | 0.782 | 10.61  | 0.007 | 13.96  | 0.034 |
| 1.12   | 0.404 | 4.47   | 0.633 | 7.82   | 0.460 | 11.17  | 0.042 | 14.52  | 0.097 |
| 1.68   | 0.225 | 5.03   | 0.420 | 8.38   | 0.840 | 11.73  | 0.033 | 15.08  | 0.061 |
| 2.23   | 0.159 | 5.58   | 0.932 | 8.93   | 0.203 | 12.29  | 0.018 | 15.64  | 0.042 |
| 2.79   | 0.606 | 6.14   | 0.113 | 9.49   | 0.259 | 12.84  | 0.141 | 16.19  | 0.057 |
| 3.35   | 0.921 | 6.70   | 0.117 | 10.05  | 0.024 | 13.40  | 0.066 | 16.75  | 0.034 |

Table 15S. P-values for pairs of points of of  $\alpha$ -pinenes vapours adsorption at 70 °C on hippuric acid crystals ( $\alpha = 0.05$ ).

| P, kPa | p     |
|--------|-------|--------|-------|--------|-------|--------|-------|--------|-------|
| 0.85   | 0.992 | 5.92   | 0.730 | 10.99  | 0.044 | 16.05  | 0.042 | 21.12  | 0.012 |
| 1.69   | 0.833 | 6.76   | 0.003 | 11.83  | 0.019 | 16.90  | 0.012 | 21.97  | 0.042 |
| 2.54   | 0.213 | 7.61   | 0.032 | 12.67  | 0.057 | 17.74  | 0.031 | 22.81  | 0.012 |
| 3.38   | 0.235 | 8.45   | 0.021 | 13.52  | 0.066 | 18.59  | 0.012 | 23.66  | 0.041 |
| 4.23   | 0.094 | 9.30   | 0.023 | 14.36  | 0.088 | 19.43  | 0.024 | 24.50  | 0.031 |
| 5.07   | 0.222 | 10.14  | 0.044 | 15.21  | 0.052 | 20.28  | 0.034 | 25.35  | 0.042 |

Table 16S. P-values for pairs of points of of  $\alpha$ -pinenes vapours adsorption at 80 °C on hippuric acid crystals ( $\alpha = 0.05$ ).

| P, kPa | p     |
|--------|-------|--------|-------|--------|-------|--------|-------|--------|-------|
| 1.24   | 0.488 | 8.71   | 0.386 | 16.18  | 0.472 | 23.65  | 0.581 | 31.12  | 0.324 |
| 2.49   | 0.055 | 9.96   | 0.514 | 17.43  | 0.218 | 24.89  | 0.032 | 32.36  | 0.238 |
| 3.73   | 0.074 | 11.20  | 0.162 | 18.67  | 0.559 | 26.14  | 0.632 | 33.61  | 0.438 |
| 4.98   | 0.026 | 12.45  | 0.318 | 19.92  | 0.587 | 27.38  | 0.254 | 34.85  | 0.214 |
| 6.22   | 0.578 | 13.69  | 0.070 | 21.16  | 0.979 | 28.63  | 0.411 | 36.10  | 0.215 |
| 7.47   | 0.630 | 14.94  | 0.874 | 22.40  | 0.012 | 29.87  | 0.125 | 37.34  | 0.143 |

Table 17S. P-values for pairs of points of of  $\alpha$ -pinenes vapours adsorption at 90 °C on hippuric acid crystals ( $\alpha = 0.05$ )

| P, kPa | p     |
|--------|-------|--------|-------|--------|-------|--------|-------|--------|-------|
| 1.79   | 0.048 | 12.51  | 0.497 | 23.23  | 0.006 | 33.95  | 0.086 | 44.67  | 0.004 |
| 3.57   | 0.086 | 14.29  | 0.560 | 25.02  | 0.321 | 35.74  | 0.035 | 46.46  | 0.002 |
| 5.36   | 0.808 | 16.08  | 0.017 | 26.80  | 0.863 | 37.52  | 0.043 | 48.24  | 0.003 |
| 7.15   | 0.453 | 17.87  | 0.011 | 28.59  | 0.169 | 39.31  | 0.015 | 50.03  | 0.004 |
| 8.93   | 0.221 | 19.65  | 0.669 | 30.38  | 0.084 | 41.10  | 0.001 | 51.82  | 0.003 |
| 10.72  | 0.732 | 21.44  | 0.561 | 32.16  | 0.021 | 42.88  | 0.002 | 53.60  | 0.004 |

Table 18S. The Freundlich equation parameters and degree of significance values  $p$  for limonene enantiomers adsorption isotherms on hippuric acid crystals ( $\alpha = 0.05$ )

---

| T, °C | $K_F \cdot 10^3$ |       | p            | n     |       | p             |
|-------|------------------|-------|--------------|-------|-------|---------------|
|       | S-(-)            | R-(+) |              | S-(-) | R-(+) |               |
| 50    | 2.5              | 3.7   | <b>0.008</b> | 0.495 | 0.526 | <b>0.01</b>   |
| 60    | 2.3              | 2.0   | <b>0.02</b>  | 0.562 | 0.545 | <b>0.0005</b> |
| 70    | 1.8              | 1.8   | 0.62         | 0.590 | 0.587 | 0.40          |
| 80    | 1.8              | 1.8   | 0.60         | 0.650 | 0.646 | 0.30          |
| 90    | 2.0              | 1.9   | 0.20         | 0.693 | 0.688 | 0.11          |
| 100   | 2.3              | 2.2   | 0.68         | 0.738 | 0.735 | 0.54          |

Table 19S. The Freundlich equation parameters and degree of significance values  $p$  for  $\alpha$ -pinene enantiomers adsorption isotherms on hippuric acid crystals ( $\alpha = 0.05$ )

---

| T, °C | $K_F \cdot 10^3$ |               | p            | n             |               | p            |
|-------|------------------|---------------|--------------|---------------|---------------|--------------|
|       | (-)- $\alpha$    | (+)- $\alpha$ |              | (-)- $\alpha$ | (+)- $\alpha$ |              |
| 50    | 3.0              | 2.7           | <b>0.002</b> | 0.657         | 0.643         | <b>0.003</b> |
| 60    | 3.1              | 3.2           | 0.400        | 0.713         | 0.717         | 0.500        |
| 70    | 3.5              | 3.6           | 0.640        | 0.770         | 0.772         | 0.770        |
| 80    | 4.2              | 4.1           | 0.560        | 0.817         | 0.818         | 0.610        |

Table 20S. Dispersion and specific components of  $\Delta F$  (kJ/mol) of adsorption on hippuric acid and phloroglucinol crystals, calculated by the Dong method

| Adsorbate    | phloroglucinol     |                    | hippuric acid      |                    |
|--------------|--------------------|--------------------|--------------------|--------------------|
|              | $-\Delta F_{disp}$ | $-\Delta F_{spec}$ | $-\Delta F_{disp}$ | $-\Delta F_{spec}$ |
| Ethanol      | -10.1              | 9.8                | -6.5               | 10.5               |
| n-Propanol   | -8.5               | 9.5                | -5.1               | 11.0               |
| i-Propanol   | -8.7               | 7.9                | -5.2               | 9.4                |
| n-Butanol    | -6.9               | 9.6                | -3.6               | 11.8               |
| i-Butanol    | -7.0               | 8.3                | -3.7               | 10.5               |
| Benzene      | -5.9               | 2.7                | -2.6               | 5.2                |
| Toluene      | -4.2               | 2.4                | -1.0               | 5.5                |
| Ethylacetate | -6.6               | 4.5                | -3.3               | 6.3                |

Table 21S. The impacts of intermolecular interactions in  $\Delta F$ , by LFER calculations

| Adsorbate    | phloroglucinol     |                  |                  | hippuric acid      |                  |                  |
|--------------|--------------------|------------------|------------------|--------------------|------------------|------------------|
|              | $-\Delta F_{disp}$ | $-\Delta F_{io}$ | $-\Delta F_{da}$ | $-\Delta F_{disp}$ | $-\Delta F_{io}$ | $-\Delta F_{da}$ |
| n-Nonane     | 2.8                | 0.6              | 0.0              | 0.2                | 0.0              | 0.0              |
| n-Decane     | 3.9                | 0.8              | 0.0              | 2.1                | 0.2              | 0.0              |
| n-Undecane   | 5.4                | 1.2              | 0.0              | 3.9                | 0.4              | 0.0              |
| Ethanol      | 1.3                | 1.0              | 1.7              | -0.2               | -0.1             | -0.1             |
| n-Propanol   | 2.2                | 1.5              | 2.3              | 0.5                | 0.1              | 0.3              |
| i-Propanol   | 1.5                | 1.1              | 1.6              | -0.4               | -0.1             | -0.3             |
| n-Butanol    | 3.1                | 2.0              | 3.1              | 1.4                | 0.4              | 0.9              |
| i-Butanol    | 2.6                | 1.7              | 2.5              | 0.7                | 0.2              | 0.4              |
| Benzene      | 1.9                | 0.3              | 0.5              | -2.6               | -0.2             | -0.4             |
| Toluene      | 3.0                | 0.7              | 0.8              | -1.5               | -0.2             | -0.2             |
| Ethylacetate | 1.2                | 0.8              | 1.0              | -1.1               | -0.4             | -0.5             |
